# Supplementary material for: Predictors of perioperative respiratory adverse events among children with upper respiratory tract infection undergoing pediatric ambulatory ilioinguinal surgery: a prospective observational research
Source: HighWire-hosted journal article supplement (doi:10.1136/wjps-2022-000524), 2023-03-01
Supplement: wjps-2022-000524supp001_data_supplement.pdf [file wjps-2022-000524supp001_data_supplement.pdf]

Appendix 1 : The COLDS score

|                                        | 1 point                   | 2 points                                                                                                              | 5 points                                                                                                                                       |
|----------------------------------------|---------------------------|-----------------------------------------------------------------------------------------------------------------------|------------------------------------------------------------------------------------------------------------------------------------------------|
| Current signs and symptoms<br><b>C</b> | None                      | Mild<br>(Parents confirm URI and/or congestion, rhinorrhea, sore throat, sneezing, low fever, dry cough)              | Moderate / Severe<br>(purulence, wet cough, abnormal lung sounds, lethargy, toxic appearance, or high fever)                                   |
| Onset of symptoms<br><b>O</b>          | >4 weeks ago              | 2 – 4 weeks ago                                                                                                       | <2 weeks ago                                                                                                                                   |
| Presence of lung diseases<br><b>L</b>  | None                      | History of RSV, mild intermittent asthma, Bronchopulmonary dysplasia if >1 year old, loud snoring, or passive smoker. | Moderate / severe<br>(moderate, persistent asthma, infant with Bronchopulmonary dysplasia, Obstructive sleep apnoea or pulmonary hypertension) |
| Airway device<br><b>D</b>              | None or facemask          | LMA or supraglottic airway                                                                                            | Endotracheal tube                                                                                                                              |
| Surgery<br><b>S</b>                    | Other (including PE tube) | Minor airway (T/A, nasal lacrimal duct probing, flexible bronchoscopy and dental extractions)                         | Major airway<br>(cleft palate, rigid bronchoscopy, maxillofacial surgery)                                                                      |
